# Supplementary material for: Inelastic response spectra for an integrated displacement and energy-based seismic design (DEBD) of structures
Source: Frontiers journal article supplement (doi:10.3389/fbuil.2023.1264033), 2023-10-06
Supplement: Table_1.XLSX [file Table_1.XLSX]

## Sheet: Calibration_Near_Field
	S1.1 Table - Characteristics of the unscaled near field ground motion records - Calibration Inelastic Spectra
	#	Earthquake	Station	Notation	Mw	Rjb [km]	PGA [g]	PGV [m/s]
	EQ 1	San Fernando 1971	Pacoima Dam (upper left abut)	RSN77_SFERN_PUL254	6.61	0	1.25024	0.762301
	EQ 2	Coyote Lake 1979	Gilroy Array #2	RSN147_COYOTELK_G02140	5.74	8.47	0.256338	0.748029
	EQ 3	Coyote Lake 1979	Gilroy Array #3	RSN148_COYOTELK_G03140	5.74	6.75	0.256603	0.965434
	EQ 4	Coyote Lake 1979	Gilroy Array #4	RSN149_COYOTELK_G04360	5.74	4.79	0.251824	1.18118
	EQ 5	Coyote Lake 1979	Gilroy Array #6	RSN150_COYOTELK_G06230	5.74	0.42	0.421848	0.300959
	EQ 6	Imperial Valley-06 1979	Agrarias	RSN159_IMPVALL.H_H-AGR003	6.53	0	0.288747	0.54853
	EQ 7	Imperial Valley-06 1979	Brawley Airport	RSN161_IMPVALL.H_H-BRA315	6.53	8.54	0.219702	0.513579
	EQ 8	Imperial Valley-06 1979	EC County Center FF	RSN170_IMPVALL.H_H-ECC092	6.53	7.31	0.236232	0.760347
	EQ 9	Imperial Valley-06 1979	El Centro - Meloland Geot. Array	RSN171_IMPVALL.H_H-EMO000	6.53	0.07	0.317783	1.47923
	EQ 10	Imperial Valley-06 1979	El Centro Array #10	RSN173_IMPVALL.H_H-E10320	6.53	8.6	0.231655	0.884849
	EQ 11	Imperial Valley-06 1979	El Centro Array #3	RSN178_IMPVALL.H_H-E03140	6.53	10.79	0.267408	1.20912
	EQ 12	Imperial Valley-06 1979	El Centro Array #4	RSN179_IMPVALL.H_H-E04140	6.53	4.9	0.484816	1.29306
	EQ 13	Imperial Valley-06 1979	El Centro Array #5	RSN180_IMPVALL.H_H-E05140	6.53	1.76	0.530344	0.91059
	EQ 14	Imperial Valley-06 1979	El Centro Array #6	RSN181_IMPVALL.H_H-E06230	6.53	0	0.466556	0.906254
	EQ 15	Imperial Valley-06 1979	El Centro Array #7	RSN182_IMPVALL.H_H-E07230	6.53	0.56	0.469231	0.683708
	EQ 16	Imperial Valley-06 1979	El Centro Differential Array	RSN184_IMPVALL.H_H-EDA360	6.53	5.09	0.481459	1.22901
	EQ 17	Imperial Valley-06 1979	Holtville Post Office	RSN185_IMPVALL.H_H-HVP225	6.53	5.35	0.258562	0.319166
	EQ 18	Irpinia_ Italy-01 1980	Bagnoli Irpinio	RSN285_ITALY_A-BAG270	6.9	8.14	0.190547	0.295634
	EQ 19	Irpinia_ Italy-01 1980	Sturno (STN)	RSN292_ITALY_A-STU270	6.9	6.78	0.323237	0.31819
	EQ 20	Westmorland 1981	Parachute Test Site	RSN316_WESMORL_PTS225	5.9	16.54	0.232258	0.443258
	EQ 21	Morgan Hill 1984	Coyote Lake Dam - Southwest Abutment	RSN451_MORGAN_CYC285	6.19	0.18	1.30568	0.349178
	EQ 22	Morgan Hill 1984	Gilroy Array #6	RSN459_MORGAN_G06090	6.19	9.85	0.292454	0.409176
	EQ 23	Kalamata_ Greece-02 1986	Kalamata (bsmt) (2nd trigger)	RSN566_GREECE_K-KAL-WE	5.4	4	0.262823	0.73348
	EQ 24	San Salvador 1986	Geotech Investig Center	RSN568_SANSALV_GIC090	5.8	2.14	0.710617	0.72908
	EQ 25	San Salvador 1986	National Geografical Inst	RSN569_SANSALV_NGI270	5.8	3.71	0.534665	0.463536
	EQ 26	Superstition Hills-02 1987	Kornbloom Road (temp)	RSN722_SUPER.B_B-KRN360	6.54	18.48	0.139346	0.479491
	EQ 27	Superstition Hills-02 1987	Parachute Test Site	RSN723_SUPER.B_B-PTS225	6.54	0.95	0.432963	0.396246
	EQ 28	Loma Prieta 1989	Gilroy - Historic Bldg.	RSN764_LOMAP_GOF160	6.93	10.27	0.285284	0.488859
	EQ 29	Loma Prieta 1989	Gilroy Array #2	RSN766_LOMAP_G02000	6.93	10.38	0.369811	1.13496
	EQ 30	Loma Prieta 1989	Gilroy Array #3	RSN767_LOMAP_G03000	6.93	12.23	0.559229	1.13082
	EQ 31	Loma Prieta 1989	Saratoga - Aloha Ave	RSN802_LOMAP_STG000	6.93	7.58	0.514869	0.409234
	EQ 32	Loma Prieta 1989	Saratoga - W Valley Coll.	RSN803_LOMAP_WVC270	6.93	8.48	0.331324	0.531092
	EQ 33	Northridge-01 1994	Jensen Filter Plant Administrative Building	RSN982_NORTHR_JEN292	6.69	0	0.617328	0.434783
	EQ 34	Northridge-01 1994	Jensen Filter Plant Generator Building	RSN983_NORTHR_JGB292	6.69	0	1.00229	0.346899
	EQ 35	Northridge-01 1994	LA - Sepulveda VA Hospital	RSN1004_NORTHR_SPV360	6.69	0	0.934616	0.719192
	EQ 36	Northridge-01 1994	LA Dam	RSN1013_NORTHR_LDM064	6.69	0	0.427153	0.555534
	EQ 37	Northridge-01 1994	Newhall - Fire Sta	RSN1044_NORTHR_NWH360	6.69	3.16	0.597679	0.346876
	EQ 38	Northridge-01 1994	Newhall - W Pico Canyon Rd.	RSN1045_NORTHR_WPI046	6.69	2.11	0.420321	0.360897
	EQ 39	Northridge-01 1994	Pacoima Dam (downstr)	RSN1050_NORTHR_PAC265	6.69	4.92	0.437562	0.856512
	EQ 40	Northridge-01 1994	Pacoima Dam (upper left)	RSN1051_NORTHR_PUL104	6.69	4.92	1.61454	0.54167
	EQ 41	Northridge-01 1994	Pacoima Kagel Canyon	RSN1052_NORTHR_PKC360	6.69	5.26	0.434053	1.24061
	EQ 42	Northridge-01 1994	Pardee - SCE	RSN1054_NORTHR_PAR--L	6.69	5.54	0.560251	0.258062
	EQ 43	Northridge-01 1994	Rinaldi Receiving Sta	RSN1063_NORTHR_RRS228	6.69	0	0.879932	0.531501
	EQ 44	Northridge-01 1994	Sylmar - Converter Sta	RSN1084_NORTHR_SCS142	6.69	0	0.925748	0.40112
	EQ 45	Northridge-01 1994	Sylmar - Converter Sta East	RSN1085_NORTHR_SCE011	6.69	0	0.853565	0.639238
	EQ 46	Northridge-01 1994	Sylmar - Olive View Med FF	RSN1086_NORTHR_SYL360	6.69	1.74	0.852982	0.277536
	EQ 47	Kobe_ Japan 1995	KJMA	RSN1106_KOBE_KJM000	6.9	0.94	0.838917	0.377773
	EQ 48	Kobe_ Japan 1995	Port Island (0 m)	RSN1114_KOBE_PRI000	6.9	3.31	0.3488	0.322846
	EQ 49	Kobe_ Japan 1995	Takarazuka	RSN1119_KOBE_TAZ000	6.9	0	0.706185	0.813508
	EQ 50	Kobe_ Japan 1995	Takatori	RSN1120_KOBE_TAK090	6.9	1.46	0.682489	0.239044
	EQ 51	Chi-Chi_ Taiwan-04 1999	CHY074	RSN2734_CHICHI.04_CHY074N	6.2	6.02	0.341531	0.468736
	EQ 52	Chi-Chi_ Taiwan-06 1999	TCU078	RSN3473_CHICHI.06_TCU078N	6.3	5.72	0.387725	0.397718
	EQ 53	Chi-Chi_ Taiwan-06 1999	TCU080	RSN3475_CHICHI.06_TCU080N	6.3	0	0.543322	0.541725
	EQ 54	Loma Prieta 1989	Los Gatos - Lexington Dam	RSN3548_LOMAP_LEX000	6.93	3.22	0.443619	0.580915
	EQ 55	Tottori_ Japan 2000	TTR008	RSN3965_TOTTORI_TTR008EW	6.61	6.86	0.394786	0.404745
	EQ 56	Bam_ Iran 2003	Bam	RSN4040_BAM_BAM-L	6.6	0.05	0.86052	0.269322
	EQ 57	Parkfield-02_ CA 2004	PARKFIELD - EADES	RSN4065_PARK2004_EADES360	6	1.37	0.394198	0.363315
	EQ 58	Parkfield-02_ CA 2004	Slack Canyon	RSN4097_PARK2004_SCN360	6	1.6	0.349228	0.784046
	EQ 59	Parkfield-02_ CA 2004	Parkfield - Cholame 1E	RSN4098_PARK2004_C01090	6	1.66	0.442854	0.364742
	EQ 60	Parkfield-02_ CA 2004	Parkfield - Cholame 2WA	RSN4100_PARK2004_C02090	6	1.63	0.62402	0.890014
	EQ 61	Parkfield-02_ CA 2004	Parkfield - Cholame 3E	RSN4101_PARK2004_TM3360	6	4.95	0.817513	0.245704
	EQ 62	Parkfield-02_ CA 2004	Parkfield - Cholame 3W	RSN4102_PARK2004_C03360	6	2.55	0.57968	0.798834
	EQ 63	Parkfield-02_ CA 2004	Parkfield - Cholame 4W	RSN4103_PARK2004_C04090	6	3.3	0.576535	0.729563
	EQ 64	Parkfield-02_ CA 2004	Parkfield - Fault Zone 1	RSN4107_PARK2004_COW360	6	0.02	0.836159	0.605895
	EQ 65	Parkfield-02_ CA 2004	Parkfield - Fault Zone 9	RSN4113_PARK2004_Z09090	6	1.22	0.152819	0.393869
	EQ 66	Parkfield-02_ CA 2004	Parkfield - Fault Zone 12	RSN4115_PARK2004_PRK360	6	0.88	0.306777	1.16044
	EQ 67	Parkfield-02_ CA 2004	Parkfield - Stone Corral 1E	RSN4126_PARK2004_SC1360	6	2.85	0.839255	0.698168
	EQ 68	Niigata_ Japan 2004	NIG021	RSN4211_NIIGATA_NIG021NS	6.63	10.21	1.78513	1.08688
	EQ 69	Niigata_ Japan 2004	NIGH11	RSN4228_NIIGATA_NIGH11EW	6.63	6.27	0.599964	0.621466
	EQ 70	L'Aquila_ Italy 2009	L'Aquila - V. Aterno - Centro Valle	RSN4480_L-AQUILA_GX066XTE	6.3	0	0.666038	0.626897
	EQ 71	L'Aquila_ Italy 2009	L'Aquila - V. Aterno -F. Aterno	RSN4482_L-AQUILA_CU104YLN	6.3	0	0.441066	0.85689
	EQ 72	L'Aquila_ Italy 2009	L'Aquila - Parking	RSN4483_L-AQUILA_AM043YLN	6.3	0	0.361519	0.762896
	EQ 73	Chuetsu-oki_ Japan 2007	Joetsu Kakizakiku Kakizaki	RSN4847_CHUETSU_65010EW	6.8	9.43	0.456769	0.295914
	EQ 74	Darfield_ New Zealand 2010	Christchurch Botanical Gardens	RSN6887_DARFIELD_CBGSN89W	7	18.05	0.190269	1.3422
	EQ 75	Darfield_ New Zealand 2010	DSLC	RSN6897_DARFIELD_DSLCN27W	7	5.28	0.257264	0.433702
	EQ 76	Darfield_ New Zealand 2010	GDLC	RSN6906_DARFIELD_GDLCN55W	7	1.22	0.780787	0.347397
	EQ 77	Darfield_ New Zealand 2010	HORC	RSN6911_DARFIELD_HORCS72E	7	7.29	0.47936	0.362873
	EQ 78	Darfield_ New Zealand 2010	LINC	RSN6927_DARFIELD_LINCN67W	7	5.07	0.461493	0.572499
	EQ 79	Darfield_ New Zealand 2010	Christchurch Resthaven	RSN6959_DARFIELD_REHSN02E	7	19.48	0.263187	0.41558
	EQ 80	Darfield_ New Zealand 2010	Riccarton High School	RSN6960_DARFIELD_RHSCS04W	7	13.64	0.233589	0.64881
	EQ 81	Darfield_ New Zealand 2010	ROLC	RSN6962_DARFIELD_ROLCS29E	7	0	0.391663	0.96603
	EQ 82	Darfield_ New Zealand 2010	TPLC	RSN6975_DARFIELD_TPLCN27W	7	6.11	0.300652	0.865269
	EQ 83	Christchurch_ New Zealand 2011	Pages Road Pumping Station	RSN8119_CCHURCH_PRPCW	6.2	1.92	0.674518	0.973121
	EQ 84	Christchurch_ New Zealand 2011	Christchurch Resthaven	RSN8123_CCHURCH_REHSS88E	6.2	5.11	0.715393	0.67315

## Sheet: Calibration_Far_Field
	S1.2 Table - Characteristics of the unscaled far field ground motion records - Calibration Inelastic Spectra
	#	Earthquake	Station	Notation	Mw	Rjb [km]	PGA [g]	PGV [m/s]
	EQ 1	San Fernando 1971	LA - Hollywood Stor FF	RSN68_SFERN_PEL090	6.61	22.77	0.231654	0.372275
	EQ 2	Imperial Valley-06 1979	Delta	RSN169_IMPVALL.H_H-DLT352	6.53	22.03	0.354235	0.247637
	EQ 3	Coalinga-01 1983	Cantua Creek School	RSN322_COALINGA.H_H-CAK360	6.36	23.78	0.290518	0.268594
	EQ 4	Coalinga-01 1983	Parkfield - Fault Zone 14	RSN338_COALINGA.H_H-Z14090	6.36	28.11	0.275268	0.329823
	EQ 5	Superstition Hills-02 1987	Imperial Valley Wildlife Liquefaction Array	RSN729_SUPER.B_B-IVW360	6.54	23.85	0.208019	0.699535
	EQ 6	Loma Prieta 1989	Hollister - South & Pine	RSN776_LOMAP_HSP000	6.93	27.67	0.369947	0.27271
	EQ 7	Loma Prieta 1989	Hollister Differential Array	RSN778_LOMAP_HDA255	6.93	24.52	0.278566	0.262443
	EQ 8	Northridge-01 1994	LA - Baldwin Hills	RSN985_NORTHR_BLD090	6.69	23.5	0.240576	0.281297
	EQ 9	Northridge-01 1994	LA - Centinela St	RSN987_NORTHR_CEN155	6.69	20.36	0.461739	0.248147
	EQ 10	Northridge-01 1994	LA - Saturn St	RSN1003_NORTHR_STN020	6.69	21.17	0.472165	0.303964
	EQ 11	Kobe_ Japan 1995	Abeno	RSN1100_KOBE_ABN090	6.9	24.85	0.233203	0.403903
	EQ 12	Kobe_ Japan 1995	Kakogawa	RSN1107_KOBE_KAK090	6.9	22.5	0.328783	0.257845
	EQ 13	Chi-Chi_ Taiwan-03 1999	CHY080	RSN2495_CHICHI.03_CHY080E	6.2	21.34	0.476857	0.31864
	EQ 14	Chi-Chi_ Taiwan-03 1999	TCU065	RSN2618_CHICHI.03_TCU065E	6.2	25.17	0.348406	0.214091
	EQ 15	Niigata_ Japan 2004	NIG023	RSN4213_NIIGATA_NIG023NS	6.63	25.33	0.405987	0.36852
	EQ 16	Chuetsu-oki_ Japan 2007	Joetsu Yanagishima paddocks	RSN4846_CHUETSU_65009NS	6.8	28.07	0.330291	0.20823
	EQ 17	Chuetsu-oki_ Japan 2007	Joetsu City	RSN4853_CHUETSU_65019NS	6.8	25.68	0.281069	0.186912
	EQ 18	Chuetsu-oki_ Japan 2007	Tokamachi Chitosecho	RSN4858_CHUETSU_65028NS	6.8	25.35	0.251206	0.530457
	EQ 19	Chuetsu-oki_ Japan 2007	Yamakoshi Takezawa Nagaoka	RSN4868_CHUETSU_65041NS	6.8	22.23	0.358493	0.217074
	EQ 20	Iwate_ Japan 2008	Tamati Ono	RSN5775_IWATE_54009NS	6.9	28.9	0.287809	0.562095
	EQ 21	Iwate_ Japan 2008	Iwadeyama	RSN5780_IWATE_54015NS	6.9	20.77	0.355516	0.361931
	EQ 22	Iwate_ Japan 2008	Yuzawa Town	RSN5806_IWATE_55461NS	6.9	22.41	0.239929	0.629663
	EQ 23	Iwate_ Japan 2008	Yuzama Yokobori	RSN5807_IWATE_55462NS	6.9	27.1	0.363167	0.357922
	EQ 24	Joshua Tree_ CA 1992	Indio - Jackson Road	RSN6877_JOSHUA_5294090	6.1	25.04	0.407018	0.148666
	EQ 25	Darfield_ New Zealand 2010	Pages Road Pumping Station	RSN6953_DARFIELD_PRPCS	7	24.55	0.223084	0.202313
