# Supplementary material for: Inelastic response spectra for an integrated displacement and energy-based seismic design (DEBD) of structures
Source: Frontiers journal article supplement (doi:10.3389/fbuil.2023.1264033), 2023-10-06
Supplement: Table_2.XLSX [file Table_2.XLSX]

## Sheet: Worked_Example_Near_Field
	S2 Table - Characteristics of the scaled near field ground motion records - Worked Example
	#	Earthquake	Station	Notation	Scale Factor	Mw	Rjb [km]	PGA [g]	PGV [m/s]
	EQ 1	Kocaeli_ Turkey 1999	Gebze	RSN1161_KOCAELI_GBZ000	2.1189	7.51	7.57	0.553448	0.945102
	EQ 2	Kocaeli_ Turkey 1999	Izmit	RSN1165_KOCAELI_IZT180	2.1366	7.51	3.62	0.352862	0.47687
	EQ 3	Kocaeli_ Turkey 1999	Yarimca	RSN1176_KOCAELI_YPT060	1.4294	7.51	1.38	0.324163	0.996031
	EQ 4	Chi-Chi_ Taiwan 1999	CHY024	RSN1193_CHICHI_CHY024-E	1.3917	7.62	9.62	0.392486	0.711298
	EQ 5	Chi-Chi_ Taiwan 1999	CHY101	RSN1244_CHICHI_CHY101-E	1.3521	7.62	9.94	0.459855	0.878417
	EQ 6	Chi-Chi_ Taiwan 1999	TCU029	RSN1476_CHICHI_TCU029-E	2.7215	7.62	28.04	0.429495	1.01932
	EQ 7	Chi-Chi_ Taiwan 1999	TCU033	RSN1478_CHICHI_TCU033-E	2.0712	7.62	40.88	0.326568	0.86009
	EQ 8	Chi-Chi_ Taiwan 1999	TCU038	RSN1481_CHICHI_TCU038-E	2.5051	7.62	25.42	0.362805	1.4214
	EQ 9	Chi-Chi_ Taiwan 1999	TCU049	RSN1489_CHICHI_TCU049-E	1.6658	7.62	3.76	0.465237	0.891508
	EQ 10	Chi-Chi_ Taiwan 1999	TCU051	RSN1491_CHICHI_TCU051-E	1.962	7.62	7.64	0.314483	1.05585
	EQ 11	Chi-Chi_ Taiwan 1999	TCU053	RSN1493_CHICHI_TCU053-E	1.7566	7.62	5.95	0.403816	0.695245
	EQ 12	Chi-Chi_ Taiwan 1999	TCU056	RSN1496_CHICHI_TCU056-E	2.2553	7.62	10.48	0.35318	0.966555
	EQ 13	Chi-Chi_ Taiwan 1999	TCU101	RSN1528_CHICHI_TCU101-E	1.7024	7.62	2.11	0.361697	1.30696
	EQ 14	El Mayor-Cucapah_ Mexico 2010	El Centro Array #12	RSN8161_SIERRA.MEX_E12360	1.1287	7.2	9.98	0.374605	0.819083
	EQ 15	El Mayor-Cucapah_ Mexico 2010	Westside Elementary School	RSN8606_SIERRA.MEX_CIWESHNN	1.6034	7.2	10.31	0.414394	0.88504
